# Supplementary material
Source: PubMed Central journal article supplement (PMC3981481)
Supplement: NIHMS565767-supplement-Supplementary_Information.pdf [file NIHMS565767-supplement-Supplementary_Information.pdf]

**String method for calculation of minimum  
free-energy paths in Cartesian space in  
freely-tumbling systems**

**Supporting Information**

Davide Branduardi\* and José D. Faraldo-Gómez\*

*Theoretical Molecular Biophysics Group, Max Planck Institute of Biophysics,  
Max-von-Laue Strasse 3, DE-60438, Frankfurt-am-Main, Germany*

E-mail: [davide.branduardi@biophys.mpg.de](mailto:davide.branduardi@biophys.mpg.de); [jose.faraldo@biophys.mpg.de](mailto:jose.faraldo@biophys.mpg.de)

---

\*To whom correspondence should be addressed

# 1 Errors on the free-energy estimates

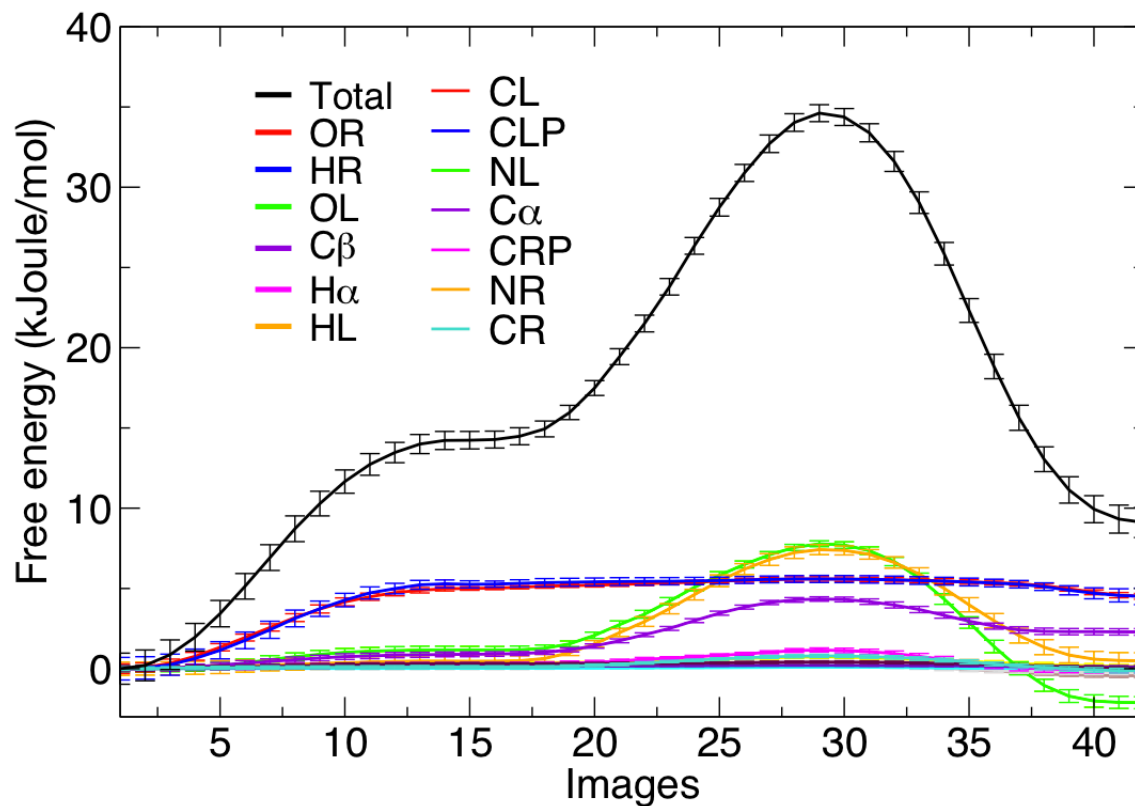

Figure 1: **Total free energy and per atom decomposition for alanine dipeptide.** The average free energy profile calculated over the last 30 iterations of string optimization together with per-atom decomposition. Error bars are associated to the variation in free energy in these last 30 steps. The error on the total free energy amounts to 1.4 kJoule/mol maximum.

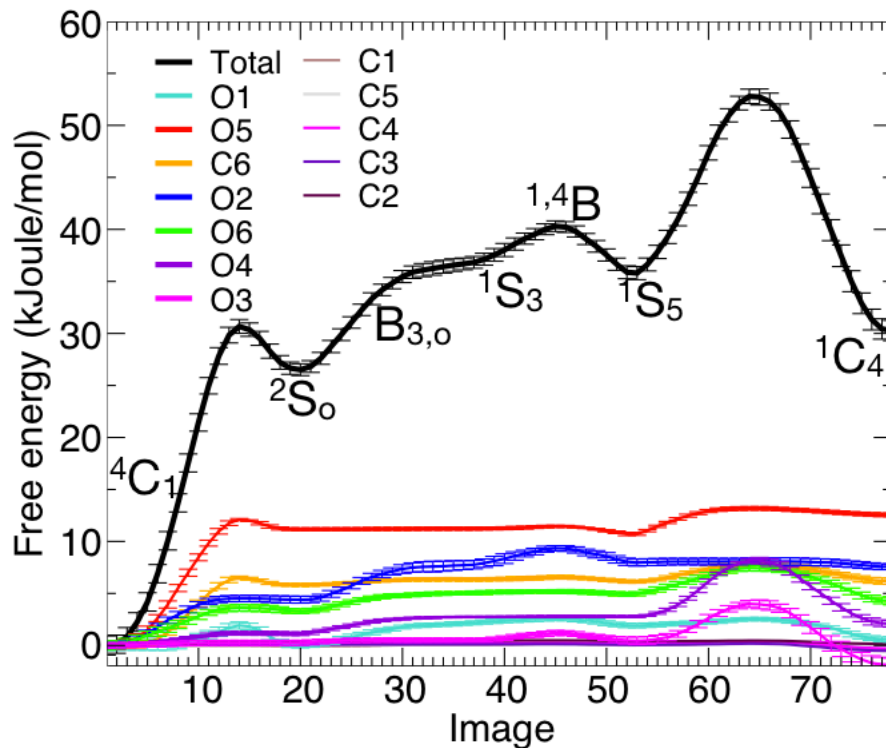

Figure 2: **Total free energy and per atom decomposition for  $\beta$ -D mannose in water**  
 The average free energy profile calculated over the last 30 iterations of string optimisation together with per-atom decomposition. Error bars are associated to the variation in free energy in these last 30 steps. The error on the total free energy amounts to 1.4 kJoule/mol maximum.

## 2 Committor distributions

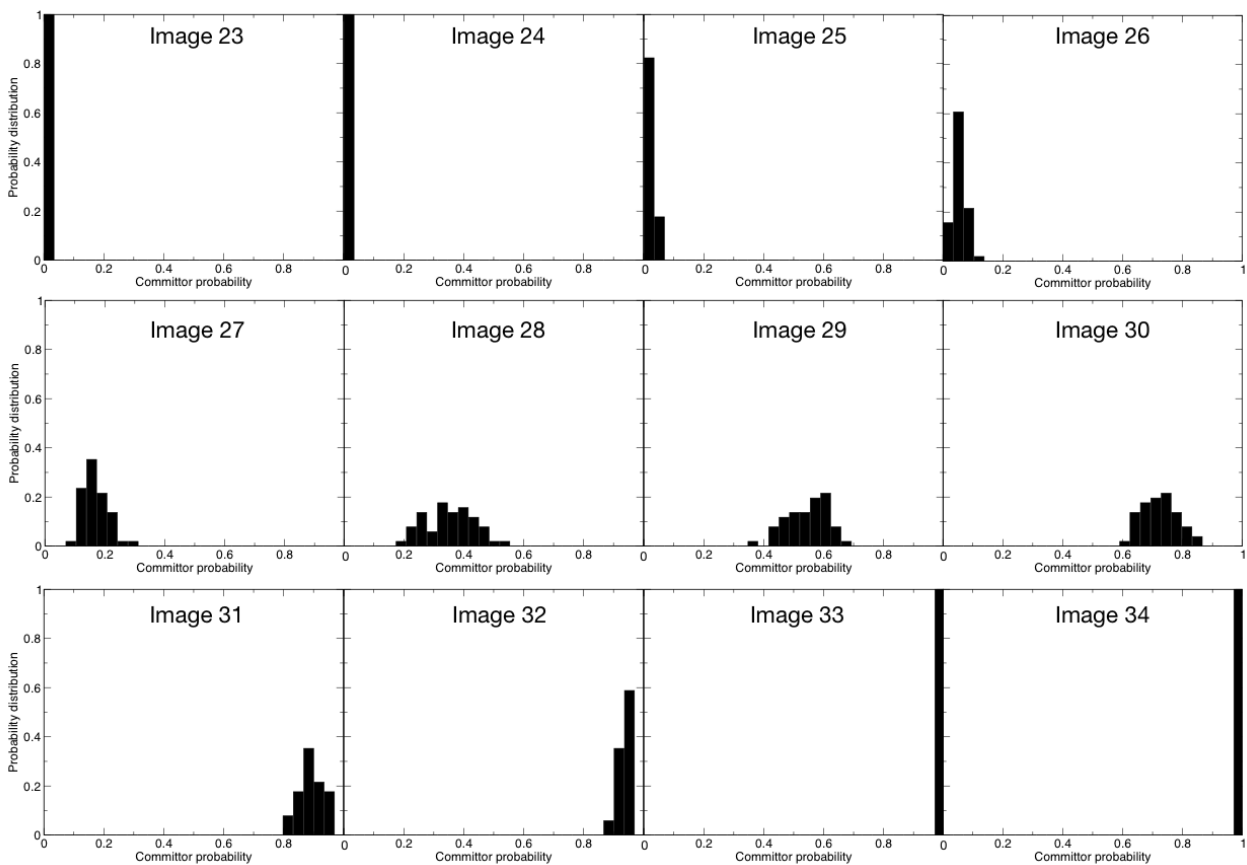

Figure 3: Committor distributions for the optimized string for alanine dipeptide using all the atoms but methyl hydrogens. This figure is an expanded version of Fig. 5A (main text).

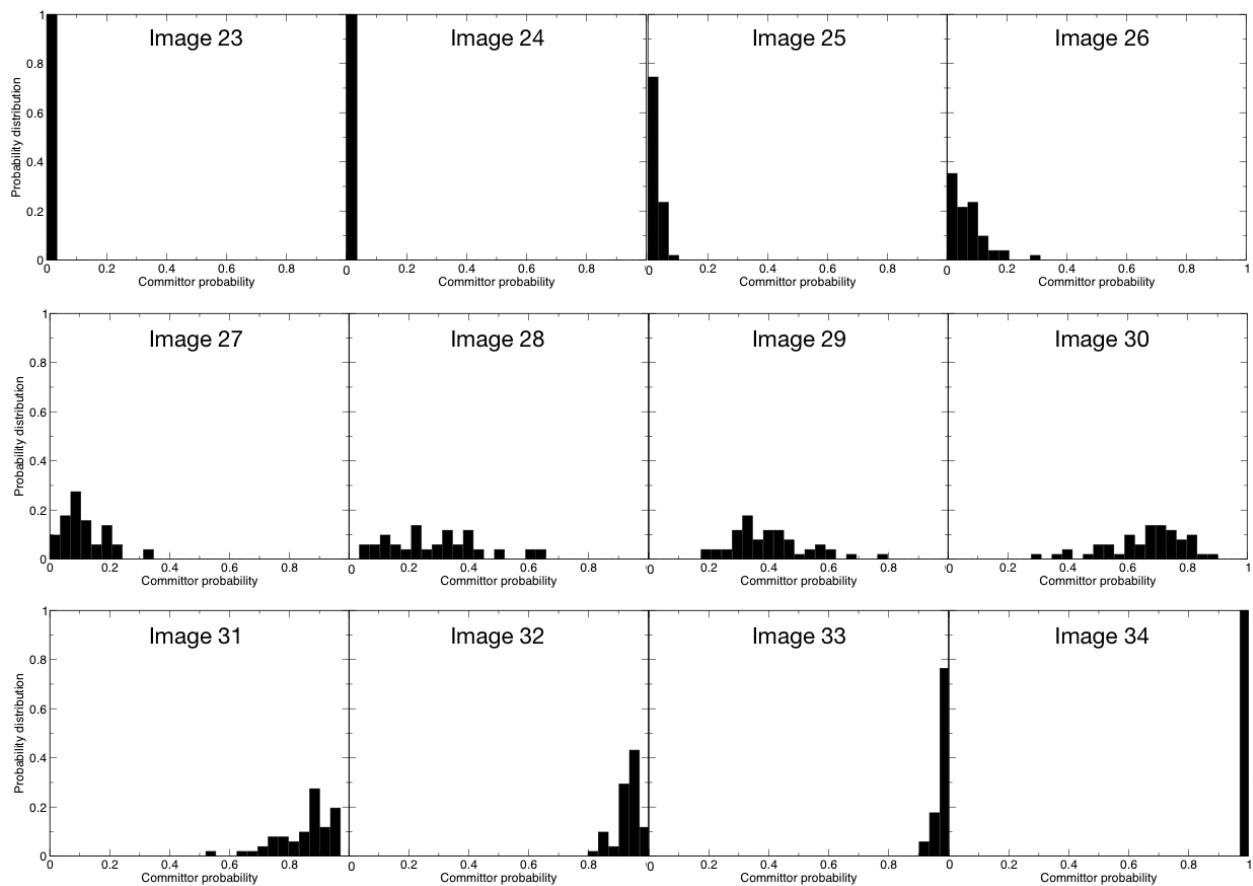

Figure 4: **Committer distributions for the optimized string for alanine dipeptide using only the atoms that carry substantial free energy contributions.** This figure is an expanded version of Fig. 9A (main text).
